# Supplementary material for: The Effect of Silane Acrylate Containing Ethylene Glycol Chains on the Adhesive Performance and Viscoelastic Behavior of Acrylic Pressure-Sensitive Adhesives for Flexible Displays
Source: MDPI journal article supplement (doi:10.3390/polym15173601), 2023-08-30
Supplement: s1 [file s1]

# The Effect of Silane Acrylate Containing Ethylene Glycol Chains on the Adhesive Performance and Viscoelastic Behavior of Acrylic Pressure-sensitive Adhesives for Flexible Displays

Woong Cheol Seok <sup>†</sup>, Jong Tae Leem <sup>†</sup> and Ho Jun Song <sup>\*</sup>

Green and Sustainable Materials R&D Department, Korea Institute of Industrial Technology, 89 Yangdaegiro-gil, Ipjang-myeon, Seobuk-gu, Cheonan-si 31056, Chungcheongnam-do, Republic of Korea; vmfosel07@naver.com (W.C.S.); netwt700@naver.com (J.T.L.)

<sup>\*</sup> Correspondence: song3026@kitech.re.kr; Tel.: +82-41-589-8467; Fax: +82-41-589-8550

<sup>†</sup> These authors contributed equally to this work.

## Supporting

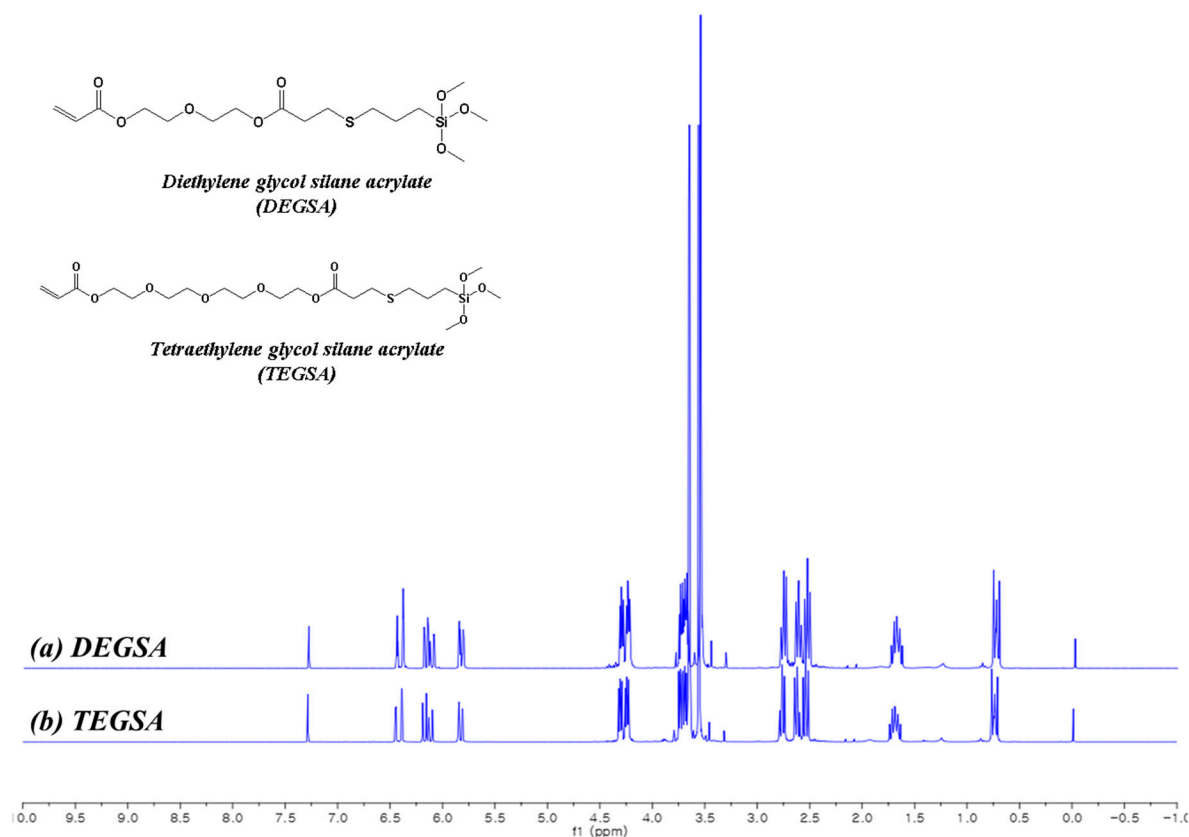

Figure S1 NMR spectrum of synthesized silane acrylates

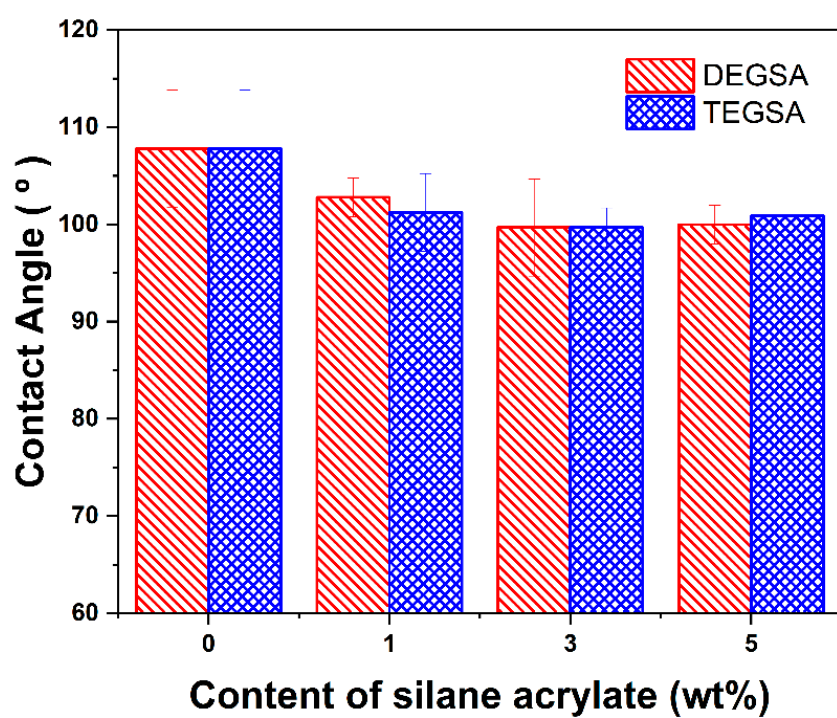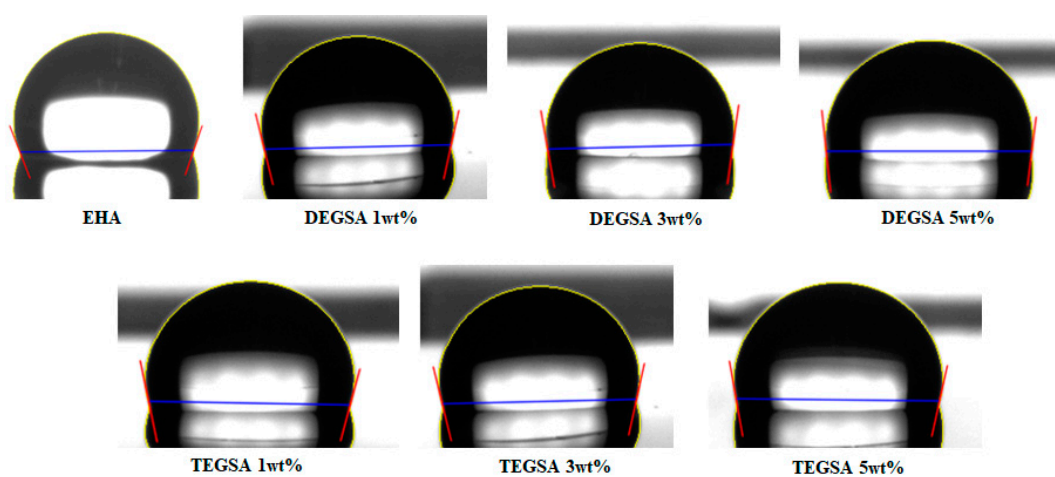

Figure S2 Surface hydrophilicity of acrylic PSAs according to silane acrylate
